# Supplementary material
Source: PubMed Central journal article supplement (PMC3478055)
Supplement: supp_mcs197_mcs197supp.pdf [file supp_mcs197_mcs197supp.pdf]

## SUPPLEMENTARY DATA

FIG. S1. Conserved C-terminal of Santalales B-class gene homologues: alignment showing the conserved C-terminal motifs of the B-class genes isolated in this study.

|                                           | PI motif                               |         |
|-------------------------------------------|----------------------------------------|---------|
| PI ( <i>Arabidopsis thaliana</i> )        | ---M-RDHDG--Q---FGYRVQPIQPNLQEKIMSLVID | [ 208 ] |
| FBPI ( <i>Petunia hybrida</i> )           | QQRENHDY-QN-HMP-FAFRVQPMQPNLQERL-----  | [ 210 ] |
| pMADS2 ( <i>Petunia hybrida</i> )         | HQR-DRDY-EYQQMP-FALRVQPMQPNLHERM-----  | [ 212 ] |
| DiiPI-1 ( <i>Dillnia indica</i> )         | HQGVDRDYHT--QMP-FAFRVQPMQPNLQERI-----  | [ 189 ] |
| DiiPI-2 ( <i>Dillnia indica</i> )         | HQGVDRDYHN--QVP-FAFRVQPMQPNLQERI-----  | [ 189 ] |
| VialPI-1 ( <i>Viscum alniformosanae</i> ) | ---GGRGNHNPPDMP-FVFRVQPMQPNLQETIHTIQP- | [ 190 ] |
| ViarPI-2 ( <i>Viscum articulatum</i> )    | ---GGRGYHNPHDMP-FPFRVQPMQPNLQERMQNIQL- | [ 190 ] |
| ViarPI-1 ( <i>Viscum articulatum</i> )    | ---GGRGYHNPHDMP-FPFRVQPMQPNLQERMQNIQL- | [ 190 ] |
| OliPI ( <i>Olex imbreata</i> )            | H-SGPRDY-HPHDVP-FLFRVQPIQPNLQDRI-----  | [ 203 ] |
| SaaPI ( <i>Satum album</i> )              | VAA-ARGY-HAHEMP-FAFRVQPMQPNLQERMKNIQL- | [ 204 ] |
| ThcPI ( <i>Thesium chinensis</i> )        | GTS--RGY-D--ELP-FAFRVQPMQPNLQERMHNIQL- | [ 188 ] |
| ChmPI ( <i>Champereia manillana</i> )     | -----P-QAP-FAFRVQPMQPNLQDRM-----       | [ 195 ] |
| BalPI ( <i>Balanophora laxiflora</i> )    | GNA-GRDY-NP-QMP-FAFRVQPIQPNLQERI-----  | [ 198 ] |
| BafPI ( <i>Balanophora fungosa</i> )      | GQA-GRDY-DA-QMP-FAFRVQPIQPNLQDRI-----  | [ 199 ] |
| SchPI ( <i>Schoepfia jasminodora</i> )    | GNA--RNYGHHNQMP-FAFRVQPMQPNLQERM-----  | [ 218 ] |
| LokPI ( <i>Loranthus kanoi</i> )          | HQH-----QMPNFAFRVQPMQPNLRDRI-----      | [ 209 ] |
| LodPI ( <i>Loranthus delivayi</i> )       | HQH-----QMPNFTFRVQPMQPNLQDRI-----      | [ 209 ] |

|                                            | PI derived motif             | EuAP3 motif |         |
|--------------------------------------------|------------------------------|-------------|---------|
| AP3 ( <i>Arabidopsis thaliana</i> )        | AYALRFHQNHYYPNH--GLH-APSA    | SDII-TFHLL  | [ 232 ] |
| GP ( <i>Petunia hybrida</i> )              | ILALRLQPNHH--QPNHHHLH-SGGG   | SDIT-TFALLE | [ 231 ] |
| DiiAP3 ( <i>Dillnia indica</i> )           | -----H-SGAGS                 | DLT-TFTLLE  | [ 205 ] |
| BalAP3 ( <i>Balanophora laxiflora</i> )    | -FPIRLQPTQQQ-QHHHH-ILH--G--  | ADIT-TYSLLE | [ 208 ] |
| PhTM6 ( <i>Petunia hybrida</i> )           | LYAFRLQTL----HP----NLQ-NGGGE | FSGR-DLRLA- | [ 225 ] |
| DiiTM6 ( <i>Dillnia indica</i> )           | NCSYRLH-----HE----NVH--QAGY  | GIQ-DLRLS-  | [ 211 ] |
| ViarTM6-1 ( <i>Viscum articulatum</i> )    | QYVFSL-----NHH-PQQGF         | FSGH-DLRLA- | [ 209 ] |
| ViarTM6-2 ( <i>Viscum articulatum</i> )    | QYGFS-----HP----NVH-PPEGY    | ESS-DLRHG-  | [ 192 ] |
| VialTM6 ( <i>Viscum alniformosanae</i> )   | QYGFSQ-----PREGY             | ESH-DLRLA-  | [ 188 ] |
| SaaTM6 ( <i>Satum album</i> )              | LYAFSLHPH----HP----NLH-PEDGF | FSGH-DLRLG- | [ 213 ] |
| BafTM6 ( <i>Balanophora fungosa</i> )      | MYPFN-----YVNNPDI            | FSGP-NLRLA- | [ 210 ] |
| BaLTM6 ( <i>Balanophora laxiflora</i> )    | MYPFN-----YVDNPGVYF          | FSGP-DLRLA- | [ 210 ] |
| OliTM6 ( <i>Olex imbreata</i> )            | LYALGLHAG----HP----HVH-PAQGY | GPH-DLRLA-  | [ 203 ] |
| ThcTM6 ( <i>Thesium chinensis</i> )        | LYAFSLHPQH---HL----HLH-PEG-  | YGPHDLRLA-  | [ 214 ] |
| SchTM6 ( <i>Schoepfia jasminodora</i> )    | LYAFSLHSN----TP----NIH-HEQGY | GNE-ALRLA-  | [ 215 ] |
| ChmTM6 ( <i>Champereia manillana</i> )     | LYAFSVHPH----HP----NLH-PDDGY | FSGH-DLRLA- | [ 213 ] |
| LodTM6 ( <i>Loranthus delivayi</i> )       | MY-FGLHSN----AP----NLH-LEQGY | DSQ-DLRLA-  | [ 215 ] |
| TapTM6 ( <i>Taxillus pseudochinensis</i> ) | MYAFGLHSS----TP----NLHQLDQGY | DSQ-DLRLA-  | [ 216 ] |
| LokTM6 ( <i>Loranthus kanoi</i> )          | MY-FGLHSN----AP----NLH-LEQGY | DSQ-DLRLA-  | [ 202 ] |

PaleoAP3 motif

FIG. S2. *RPB2* gene tree showing the obtained *RPB2* sequences belong to the d clade. Phylogenetic analysis inferred from Bayesian analysis (BI) based on a 1719 nucleotide alignments. Numbers above the branches are Bayesian posterior probabilities, and values below are maximum likelihood branch support as determined by GARLI.

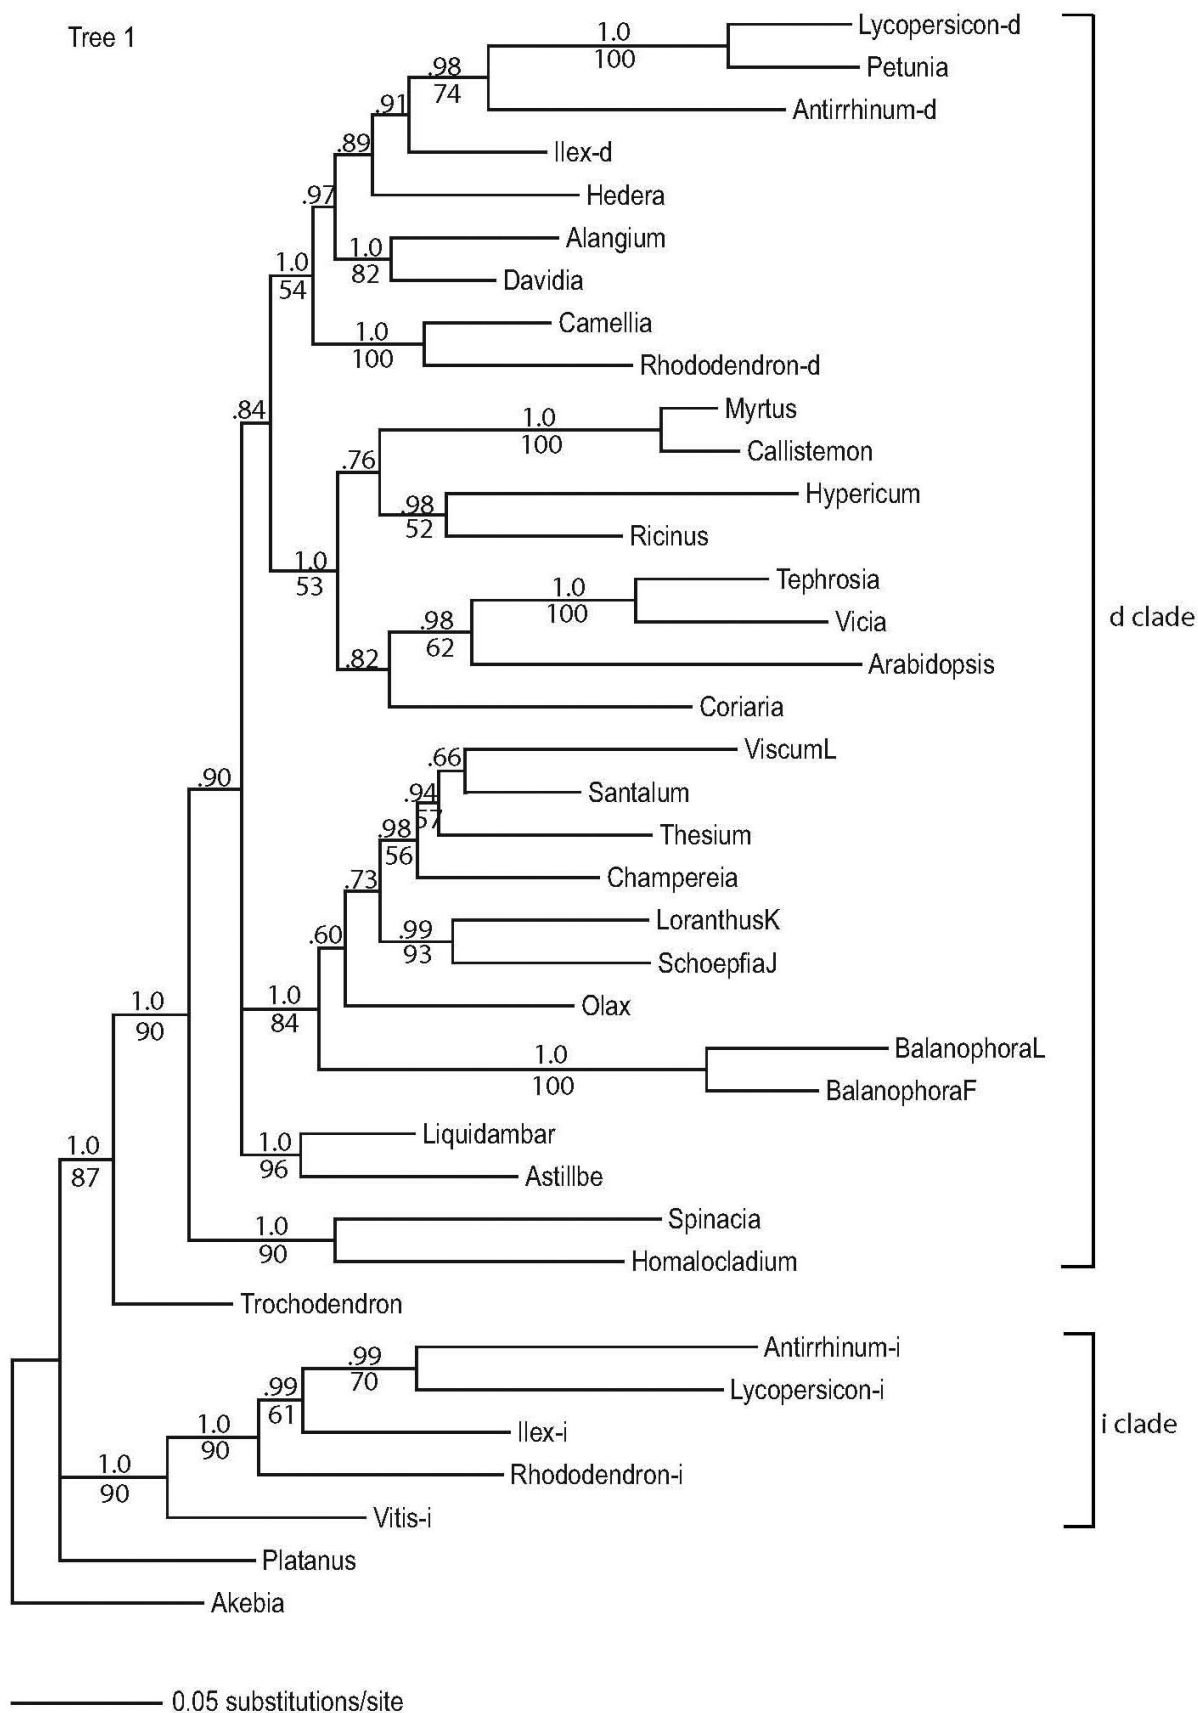

FIG. S3. Genomic structure of *Balanophora AP3* and *TM6* homologues. Grey boxes indicate exons and lines indicate introns (bp). White boxes indicate the novel exon (exon 6a) of *Balanophora AP3*.

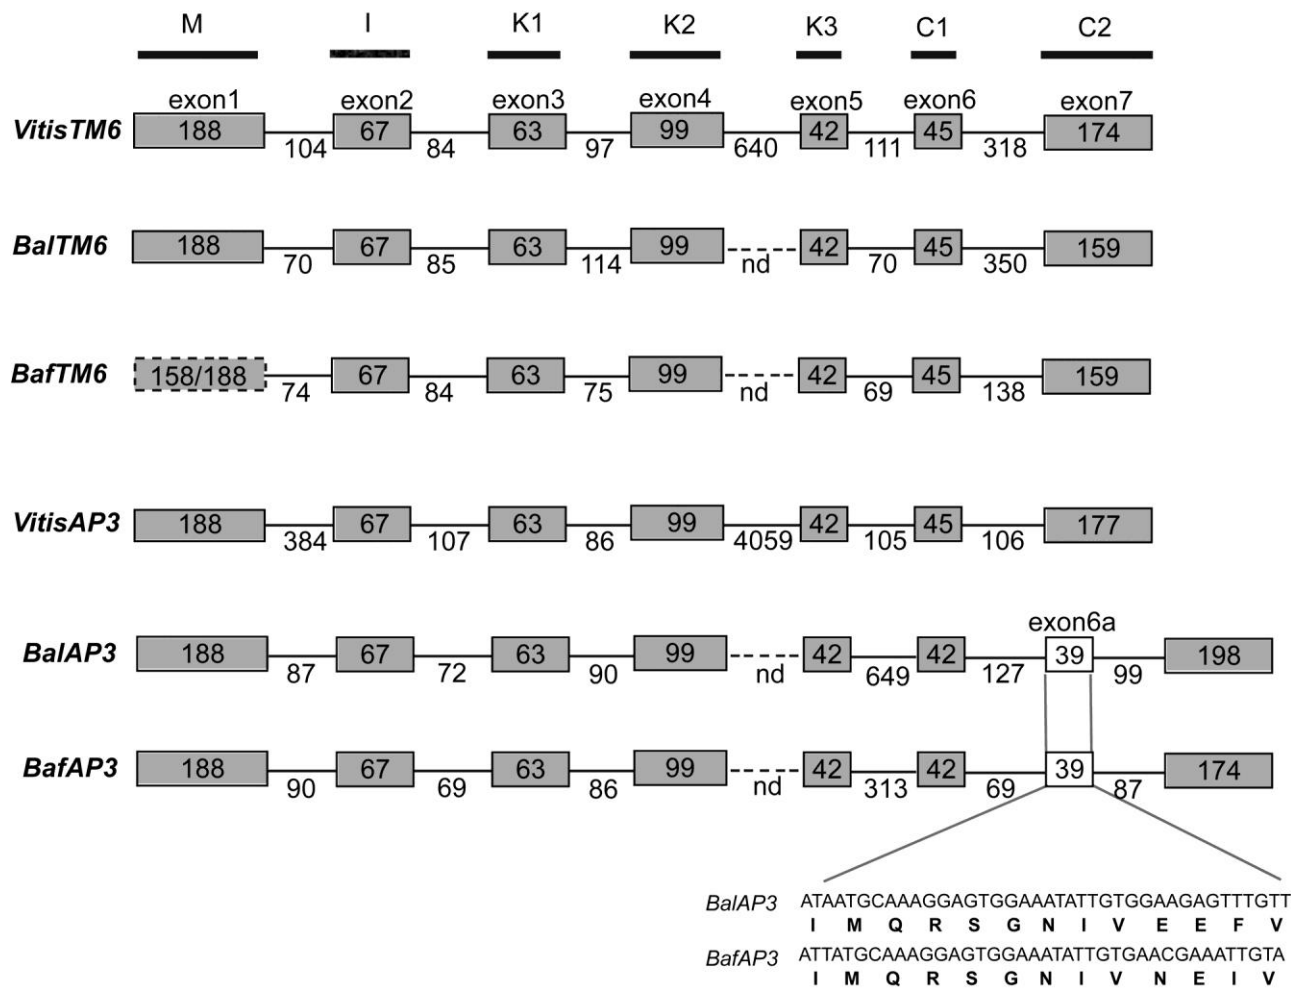

TABLE S1. Primers used in this study

(A) Primers used in amplifying and sequencing of 18S and *matR*

| Primer Name | Position        | Primer sequences (5' to 3') | Reference*                   |
|-------------|-----------------|-----------------------------|------------------------------|
| 12F         | 18S fwd         | TCCTGCCAGTASTCATATGC        | (Malecot and Nickrent, 2008) |
| 1769R       | 18S rev         | CACCTACGGAAACCTTGTT         | (Nickrent and Starr, 1994)   |
| 540f        | 18S fwd         | TGGTGCCAGCAGCCGC            |                              |
| 1050f       | 18S fwd         | GGTCGCAAGGCTGAAACT          |                              |
| 555r        | 18S rev         | GCGGCTGCTGGCACCA            |                              |
| 1065r       | 18S rev         | AGTTTCAGCCTTGCGACC          |                              |
| 26F         | <i>matR</i> fwd | GACCGCTNACAGTAGTTCT         | (Meng et al., 2002)          |
| 1858R       | <i>matR</i> rev | TGCTTGTGGGCYRGGGAGAA        | (Meng et al., 2002)          |
| F2          | <i>matR</i> fwd | GCCGCCTTCCTCATAGA           |                              |
| F3          | <i>matR</i> fwd | GTAAGCACCATCCAT             |                              |
| R2          | <i>matR</i> rev | TCTATGAGGAAGGCGGC           |                              |
| R3          | <i>matR</i> rev | ATGGATACGGTGCTTTAC          |                              |

(B) Primers used in 5'RACE of *Balanophora* B-class genes

| Primer Name | Position       | Primer sequences (5' to 3') |
|-------------|----------------|-----------------------------|
| BalPICUTR1  | <i>PI</i> rev  | GTGGATAATACGAAGGCA          |
| BalPIML1    | <i>PI</i> rev  | TTTATGAGCCCGTTTCTTCG        |
| BalAP3KR2   | <i>AP3</i> rev | CCTCTTCCATTTCTCCGTT         |
| BalAP3KL1   | <i>AP3</i> rev | TCTCAACAACAAACCCGAAT        |
| BalTM6CUTR1 | <i>TM6</i> rev | TTCACAAGGGGGGCAAC           |
| BalTM6KL1   | <i>TM6</i> rev | ACTCAGCTTGCATTTTCTCG        |

(C) Primers used in RT-PCR gene expression study

| Primer Name | Locus            | Primer sequences (5' to 3')         |
|-------------|------------------|-------------------------------------|
| matrF       | <i>matR</i> fwd  | TATCGGCACTACCAKGTAAAC               |
| SanmatrR3   | <i>matR</i> rev  | CCGTATTAAGTAATGGTTGTTGTTTC          |
| Lfsx1-2     | <i>LFY</i> fwd   | CACCCACGACCNTTYATNGTNACNGARCCNGGNGA |
| BalLFYR     | <i>LFY</i> rev   | TTACAAATGGAAACGATTAGTGGTAG          |
| SanRBP2F    | <i>RBP2</i> fwd  | TGGGTGGYATWCAYCGTGATCCTGA           |
| SanRBP2R    | <i>RBP2</i> rev  | GAAAHGGTATRATYGAWGCACAAAC           |
| BalPIKF1    | <i>PI</i> fwd    | GGGAGAAGAAGGCTGAG                   |
| BalPICUTR1  | <i>PI</i> rev    | GTGGATAATACGAAGGCA                  |
| BalAP3KF5   | <i>AP3</i> fwd   | AAACCAGGCAGTGGAATGGA                |
| BalAP3CR2   | <i>AP3</i> rev   | TCCGCCTGTATTTGTTCTTC                |
| BalTM6KF1   | <i>TM6</i> fwd   | GCGGAAAAGAAAGTATGAG                 |
| BalTM6CUTR1 | <i>TM6</i> rev   | TTCACAAGGGGGGCAAC                   |
| BalACTF     | <i>ACTIN</i> fwd | AGGGAGATAGTGAGGGACA                 |
| BalACTR     | <i>ACTIN</i> rev | CATCATACTCTGCTTTGGC                 |

(D) Primers used in characterizing *BalAP3* & *BafAP3* genomic sequences

| Primer Name | Locus          | Primer sequences (5' to 3') |
|-------------|----------------|-----------------------------|
| BalAP3MF2   | <i>AP3</i> fwd | GCTTCACGATTACATCTC          |
| BalAP3KR4   | <i>AP3</i> rev | CTCAAGACCGTGCAATTCTGC       |
| BalAP3E5F1  | <i>AP3</i> fwd | TGGTGGTCAAACGGAGAAAT        |
| BalAP3I6R1  | <i>AP3</i> rev | GAGGGGGATCAGACCTTT          |
| BalAP3KF2   | <i>AP3</i> fwd | GAATGAAGAACAATAACAGG        |
| BalAP3CR3   | <i>AP3</i> rev | AGCAATGAGTAGGTGGTG          |
| BalTM6MF1   | <i>TM6</i> fwd | GGATCGAGAACTCAACAA          |
| BalTM6KR2   | <i>TM6</i> rev | TCTCTAATGTTCAAACCCTCCA      |
| BalTM6KF2   | <i>TM6</i> fwd | TGATTGATCTGGAGAAAAAAT       |
| BalTM6CR2   | <i>TM6</i> rev | GGGTACATGCTAGTAGAAGGGTT     |

\* REFERENCES

- Malecot V, Nickrent DL. 2008.** Molecular phylogenetic relationships of Olacaceae and related Santalales. *Systematic Botany*, **33**: 97-106.
- Meng S-W, Zhi-Duan Chan, Li D-Z. 2002.** Phylogeny of Saururaceae base on mitochondrial *matR* gene sequence data. *Journal of Plant Research*, **115**: 71-76.
- Nickrent DL, Starr EM. 1994.** High rates of nucleotide substitution in nuclear small-subunit (18S) rDNA from holoparasitic flowering plants. *Journal of Molecular Evolution*, **39**: 62-70.

TABLE S2. Sequences used in phylogenetic construction and evolutionary rate analysis

| Taxa                  | Species                           | nuclear                    |                              |                           |          | mitochondrial |           | RPB2/RPB2-d copy |
|-----------------------|-----------------------------------|----------------------------|------------------------------|---------------------------|----------|---------------|-----------|------------------|
|                       |                                   | PI                         | AP3                          |                           | FLO/LFY  | 18S rDNA      | matR      |                  |
|                       |                                   |                            | paleoAP3/TM6                 | euAP3                     |          |               |           |                  |
| <b>Basal eudicots</b> |                                   |                            |                              |                           |          |               |           |                  |
| Buxales               |                                   |                            |                              |                           |          |               |           |                  |
| Buxaceae              | <i>Pachysandra procumbens</i>     |                            |                              |                           |          | AF094533      | AF197784  |                  |
|                       | <i>Pachysandra terminalis</i>     | GU357455 ( <i>PAtePI</i> ) | <i>PAteAP3-1</i> (GU357454)  |                           |          |               |           |                  |
| Proteales             |                                   |                            | <i>PAteAP3-2</i> (GU357462)  |                           |          |               |           |                  |
| Platanaceae           | <i>Platanus occidentalis</i>      |                            | <i>PloAP3-1</i> (AY162881)   |                           | AF106842 | U42794        | AF197793  |                  |
|                       | <i>Platanus</i> sp.               |                            | <i>PloAP3-2</i> (AY162882)   |                           |          |               |           | AY566618         |
| Ranunculales          |                                   |                            |                              |                           |          |               |           |                  |
| Lardizabalaceae       | <i>Akebia quinata</i>             | <i>AkqPI</i> (AY162837)    | <i>AkqAP3-1</i> (AY162835)   |                           |          | L31795        | AF197810  |                  |
|                       | <i>Akebia longeracemosa</i>       |                            | <i>AkqAP3-2</i> (AY162839)   |                           |          |               |           | AY566613         |
| Papaveraceae          | <i>Eschscholzia californica</i>   |                            |                              |                           | AY188789 |               |           |                  |
| Sabiales              |                                   |                            |                              |                           |          |               |           |                  |
| Sabiaceae             | <i>Meliosma dilleniiifolia</i>    | <i>MedMdPI</i> (AY436712)  | <i>MedMdAP3-1</i> (AY436709) |                           |          |               |           |                  |
|                       | <i>Meliosma squamulata</i>        |                            | <i>MedMdAP3-2</i> (AY436710) |                           |          | DQ008728      | DQ007426  |                  |
|                       | <i>MedMdAP3-2</i> (AY436711)      |                            |                              |                           |          |               |           |                  |
| Trochodendrales       |                                   |                            |                              |                           |          |               |           |                  |
| Trochodendraceae      | <i>Trochodendron aralioides</i>   | <i>TraPI-1</i> (EF436259)  | <i>TraAP3</i> (DQ453774)     |                           | AF230078 | U42816        | AF197792  | AY563269         |
|                       |                                   | <i>TraPI-2</i> (EF436260)  |                              |                           |          |               |           |                  |
| <b>Core eudicots</b>  |                                   |                            |                              |                           |          |               |           |                  |
| Apiales               |                                   |                            |                              |                           |          |               |           |                  |
| Apiaceae              | <i>Apium graveolens</i>           |                            |                              |                           |          | AF206852      |           |                  |
|                       | <i>Daucus carota</i>              | <i>MADS2</i> (AJ271148)    |                              | <i>MADS3</i> (AJ271149)   |          |               |           |                  |
|                       | <i>Petroselinum crispum</i>       |                            |                              |                           |          |               | AY453081  |                  |
| Aralidiaceae          | <i>Hedera helix</i>               |                            |                              |                           |          |               |           | AJ563601         |
| Aquifoliales          |                                   |                            |                              |                           |          |               |           |                  |
| Aquifoliaceae         | <i>Ilex aquifolium</i>            | <i>IxaGLO1</i> (GQ141105)  | <i>IxaTM6</i> (DQ479357)     | <i>IxaAP3</i> (DQ479356)  |          |               | AY453090  |                  |
|                       | <i>Ilex meseryeae</i>             |                            |                              |                           |          |               |           | AJ557240         |
|                       | <i>Ilex opaca</i>                 |                            |                              |                           |          | AF161010      |           |                  |
| Asterales             |                                   |                            |                              |                           |          |               |           |                  |
| Asteraceae            | <i>Chrysanthemum x morifolium</i> |                            |                              |                           | AB451217 |               |           |                  |
|                       | <i>Gerbera hybrida</i>            | <i>GGLO1</i> (GHY9726)     | <i>GDEF1</i> (AJ009724)      | <i>GDEF2</i> (AJ009725)   |          | AF107576      |           |                  |
|                       | <i>Helianthus annuus</i>          | <i>PMADS2</i> (X69947)     | <i>Ham31</i> (AY173069)      | <i>Ham91</i> (AY173070)   |          |               | AY453114  |                  |
|                       |                                   | <i>Ham31</i> (AY173069)    | <i>Ham91</i> (AY173070)      | <i>Ham63</i> (EF612598)   |          |               |           |                  |
| Brassicales           |                                   |                            |                              |                           |          |               |           |                  |
| Brassicaceae          | <i>Arabidopsis thaliana</i>       | <i>PI</i> (D30807)         |                              | <i>AP3</i> (D21125)       | DQ447103 | X16077        | NC_001284 | z19121           |
| Caricaceae            | <i>Carica papaya</i>              | <i>CpPI</i> (EF562500)     | <i>CpTM6-1</i> (EF562498)    | <i>CpTM6-2</i> (EF562499) |          | U42514        | AF520141  |                  |
| Caryophyllales        |                                   |                            |                              |                           |          |               |           |                  |
| Amaranthaceae         | <i>Spinacia oleracea</i>          | <i>SoPI</i> (AY604515)     |                              | <i>SoAP3</i> (AY604514)   |          | L24420        | AY453110  | AF020840         |
| Caryophyllaceae       | <i>Silene latifolia</i>           | <i>SLM2</i> (X80489)       | <i>SIAP3A</i> (AB090863)     | <i>SIAP3Y</i> (AB090864)  |          |               |           |                  |

|                |                                                                          |                                                        |                                                                                                                                               |                           |          |          |          |                      |
|----------------|--------------------------------------------------------------------------|--------------------------------------------------------|-----------------------------------------------------------------------------------------------------------------------------------------------|---------------------------|----------|----------|----------|----------------------|
| Phytolaccaceae | <i>Silene coeli-rosa</i><br><i>Phytolacca americana</i>                  |                                                        | <i>PhaTM6-1</i> (DQ479365)<br><i>PhaTM6-2</i> (DQ479366)                                                                                      |                           | AJ311804 | U42793   |          |                      |
| Polygonaceae   | <i>Homalocladium platycladum</i>                                         |                                                        |                                                                                                                                               |                           |          |          |          | DQ017114             |
| Cornales       |                                                                          |                                                        |                                                                                                                                               |                           |          |          |          |                      |
| Cornaceae      | <i>Alangium platanifolium</i><br><i>Davidia involucrata</i>              |                                                        |                                                                                                                                               |                           |          |          |          | AJ555916<br>AJ557002 |
| Hydrangeaceae  | <i>Hydrangea macrophylla</i>                                             | <i>HmPI</i> (AF230711)                                 | <i>HmTM6</i> (AF230703)                                                                                                                       | <i>HmAP3</i> (AF230702)   |          | U42781   | AY453091 |                      |
| Nyssaceae      | <i>Nyssa sylvatica</i>                                                   | <i>NsGLO1</i> (GQ141111)<br><i>NsGLO2</i> (GQ141109)   | <i>NsTM6</i> (GQ141155)                                                                                                                       | <i>NsDEF</i> (GQ141170)   |          | X16603   |          |                      |
| Styracaceae    | <i>Styrax japonicus</i>                                                  | <i>SjGLO</i> (GQ141121)                                | <i>SjTM6</i> (GQ141163)                                                                                                                       | <i>SjDEF</i> (GQ141185)   |          | L49296   |          |                      |
| Cucurbitales   |                                                                          |                                                        |                                                                                                                                               |                           |          |          |          |                      |
| Coriariaceae   | <i>Coriaria sarmentosa</i>                                               |                                                        |                                                                                                                                               |                           |          |          |          | DQ017097             |
| Cucurbitaceae  | <i>Cucumis sativus</i>                                                   | <i>CsPI</i> (AF043255)                                 |                                                                                                                                               | <i>CsMADS1</i> (AY944060) | AF059320 | AF206894 |          |                      |
| Dilleniales    |                                                                          |                                                        |                                                                                                                                               |                           |          |          |          |                      |
| Dilleniaceae   | <i>Dillenia indica</i>                                                   | <i>DiiPI-1</i> (EF549702)<br><i>DiiPI-2</i> (EF549703) | <i>DiiTM6</i> (EF549705)                                                                                                                      | <i>DiiDEF</i> (EF549703)  |          |          | AF520095 |                      |
|                | <i>Dillenia alata</i>                                                    |                                                        |                                                                                                                                               |                           |          | U38314   |          |                      |
| Ericales       |                                                                          |                                                        |                                                                                                                                               |                           |          |          |          |                      |
| Balsaminaceae  | <i>Impatiens auriculata</i><br><i>Impatiens alsamina</i>                 |                                                        |                                                                                                                                               |                           | AJ888755 |          | AF520117 |                      |
| Clethraceae    | <i>Clethra tomentosa</i>                                                 | <i>CtGLO</i> (GQ141143)                                | <i>CtTM6</i> (GQ141180)                                                                                                                       | <i>CtDEF</i> (GQ141166)   |          |          |          | AY566626             |
| Ericaceae      | <i>Rhododendron macrophyllum</i>                                         |                                                        |                                                                                                                                               |                           |          |          |          |                      |
| Diapensiaceae  | <i>Galax urceolata</i>                                                   | <i>GuGLO1</i> (GQ141151)                               | <i>GuTM6</i> (GQ141164)                                                                                                                       | <i>GuDEF</i> (GQ141187)   |          | L49281   |          |                      |
| Polemoniaceae  | <i>Phlox paniculata</i>                                                  | <i>PpGLO</i> (GQ141129)                                | <i>PpTM6</i> (GQ141157)                                                                                                                       | <i>PpDEF</i> (GQ141172)   |          |          |          | AY566627             |
| Theaceae       | <i>Camellia japonica</i>                                                 |                                                        |                                                                                                                                               |                           |          |          |          |                      |
| Fagales        |                                                                          |                                                        |                                                                                                                                               |                           |          |          |          |                      |
| Betulaceae     | <i>Betula pendula</i><br><i>Juglans nigra</i><br><i>Juglans regia</i>    | <i>BpPI</i> (AJ488589)                                 |                                                                                                                                               | <i>JrAP3</i> (AJ313089)   | GU194836 | AF206943 | AY453121 |                      |
| Fabales        |                                                                          |                                                        |                                                                                                                                               |                           |          |          |          |                      |
| Fabaceae       | <i>Lotus corniculatus</i>                                                | <i>LcPIa</i> (AY770398)<br><i>LcPIb</i> (AY770399)     | <i>LcTM6</i> (AY770401)                                                                                                                       | <i>LcAP3</i> (AY770400)   | AY770393 |          |          |                      |
|                | <i>Pisum sativum</i><br><i>Tephrosia purpurea</i><br><i>Vicia sativa</i> |                                                        |                                                                                                                                               |                           | AF035163 | U43011   | AY453078 | AJ556782<br>AJ556176 |
| Gunnerales     |                                                                          |                                                        |                                                                                                                                               |                           |          |          |          |                      |
| Gunneraceae    | <i>Gunnera tinctoria</i>                                                 |                                                        | <i>GtAP3-1</i> (AY337753)<br><i>GtAP3-2</i> (AY337754)<br><i>GtAP3-3</i> (AY337755)<br><i>GtAP3-4</i> (AY337756)<br><i>GtAP3-5</i> (AY337757) |                           |          |          |          |                      |
|                | <i>Gunnera manicata</i>                                                  |                                                        |                                                                                                                                               |                           |          | U43787   | AF520163 |                      |
| Lamiales       |                                                                          |                                                        |                                                                                                                                               |                           |          |          |          |                      |
| Oleaceae       | <i>Syringa vulgaris</i>                                                  | <i>SvPI</i> (AF052861)                                 |                                                                                                                                               | <i>SvAP3</i> (AF052869)   |          |          |          |                      |
| Plantaginaceae | <i>Antirrhinum majus</i>                                                 | <i>GLOBOSA</i> (X68831)                                |                                                                                                                                               | <i>DEFA</i> (X62810)      | M55525   | AJ236047 | AY453102 | AJ566619             |
| Malpighiales   |                                                                          |                                                        |                                                                                                                                               |                           |          |          |          |                      |
| Euphorbiaceae  | <i>Ricinus communis</i>                                                  |                                                        |                                                                                                                                               |                           |          |          |          | XM_002519014         |
| Hypericaceae   | <i>Hypericum canariense</i>                                              |                                                        |                                                                                                                                               |                           |          |          |          | AJ556993             |
| Salicaceae     | <i>Populus trichocarpa</i>                                               | <i>PtPI</i>                                            | <i>PTD</i> (AF057708)                                                                                                                         |                           |          |          |          |                      |

|                 |                                                                                                                                                      |                                                                               |                                                                                  |                                   |                      |          |                                    |                                    |
|-----------------|------------------------------------------------------------------------------------------------------------------------------------------------------|-------------------------------------------------------------------------------|----------------------------------------------------------------------------------|-----------------------------------|----------------------|----------|------------------------------------|------------------------------------|
|                 |                                                                                                                                                      | (grail3.0002017601)                                                           |                                                                                  |                                   | U93196               | AY652861 |                                    | AY674556                           |
| Myrtales        | <i>Populus balsamifera</i><br><i>Populus maximowiczii</i>                                                                                            |                                                                               |                                                                                  |                                   |                      |          |                                    |                                    |
| Myrtaceae       | <i>Callistemon subulatus</i><br><i>Eucalyptus grandis</i><br><i>Eucalyptus lehmannii</i><br><i>Melaleuca quinquenervia</i><br><i>Myrtus communis</i> | EGM2 (AF029976)<br>MeqPI (EU004206)                                           |                                                                                  |                                   | AY640314             | AM235528 |                                    | DQ017092                           |
| Rosales         |                                                                                                                                                      |                                                                               |                                                                                  |                                   |                      |          |                                    |                                    |
| Rosaceae        | <i>Malus x domestica</i><br><br><i>Prunus persica</i><br><i>Taihangia rupestris</i>                                                                  | MadMdPI (AJ291490)<br>-<br>TrPI (DQ248947)                                    | MadMdTM6 (AB081093)<br>MadMADS13 (AJ25116)<br>-<br>TrTM6 (DQ248946)              |                                   | AB162028<br>EU375891 | L28749   |                                    | EU281109<br>AF520201               |
| Saxifragales    |                                                                                                                                                      |                                                                               |                                                                                  |                                   |                      |          |                                    |                                    |
| Altingiaceae    | <i>Liquidambar</i> sp.                                                                                                                               |                                                                               |                                                                                  |                                   |                      |          |                                    | AY566623                           |
| Grossulariaceae | <i>Ribes aureum</i><br><i>Ribes sanguineum</i>                                                                                                       | -<br>RsPI (AY337742)                                                          |                                                                                  |                                   |                      | L28143   |                                    |                                    |
| Hamamelidaceae  | <i>Ribes</i> sp.<br><i>Corylopsis pauciflora</i>                                                                                                     |                                                                               | CopTM6-1 (DQ479354)<br>CopTM6-2 (DQ479355)                                       | CopAP3 (DQ479353)                 |                      |          | EF370723                           |                                    |
| Saxifragaceae   | <i>Astillbe</i> sp.<br><i>Saxifraga careyana</i>                                                                                                     |                                                                               | SacTM6 (DQ479368)                                                                | SacAP3 (DQ479367)                 |                      |          |                                    | AY566622                           |
| Santalales      |                                                                                                                                                      |                                                                               |                                                                                  |                                   |                      |          |                                    |                                    |
| Balanophoraceae | <i>Balanophora fungosa</i>                                                                                                                           | <b>BafPI (JQ613262)</b>                                                       | <b>BafTM6 (JQ613231)</b>                                                         | <b>BafAP3 (JQ613229)</b>          | <b>JQ613242</b>      | JN392868 | <b>JQ613244</b>                    | <b>JQ613269</b>                    |
| Loranthaceae    | <i>Balanophora laxiflora</i><br><i>Loranthus delavayi</i><br><i>Loranthus kaoi</i>                                                                   | <b>BalPI (JQ613261)</b><br><b>LodPI (JQ613264)</b><br><b>LokPI (JQ613263)</b> | <b>BalTM6 (JQ613232)</b><br><i>LodTM6</i> (DQ453773)<br><b>LokTM6 (JQ613241)</b> | <b>BalAP3 (JQ613230)</b>          | <b>JQ613243</b>      | JN392870 | <b>JQ613245</b><br><b>JQ613248</b> | <b>JQ613270</b><br><b>JQ613249</b> |
| Olacaceae       | <i>Ola x imbricata</i>                                                                                                                               | <b>OliPI (JQ613259)</b>                                                       | <b>OliTM6 (JQ613239)</b>                                                         |                                   |                      |          | <b>JQ613222</b>                    | <b>JQ613246</b>                    |
| Opiliaceae      | <i>Champerea manillana</i>                                                                                                                           | <b>ChmPI (JQ613258)</b>                                                       | <b>ChmTM6 (JQ613237)</b>                                                         |                                   |                      |          | <b>JQ613223</b>                    | <b>JQ613247</b>                    |
| Santalaceae     | <i>Santalum album</i>                                                                                                                                | <b>SaaPI (JQ613256)</b>                                                       | <b>SaaTM6 (JQ613238)</b>                                                         |                                   |                      |          | <b>JQ613224</b>                    | <b>JQ613250</b>                    |
| Thesiaceae      | <i>Thesium chinense</i>                                                                                                                              | <b>ThcPI (JQ613257)</b>                                                       | <b>ThcTM6 (JQ613235)</b>                                                         |                                   |                      |          | <b>JQ613225</b>                    | <b>JQ613251</b>                    |
| Schoepfiaceae   | <i>Schoepfia jasminodora</i>                                                                                                                         | <b>ScjPI (JQ613260)</b>                                                       | <b>ScjTM6 (JQ613240)</b>                                                         |                                   |                      |          | <b>JQ613226</b>                    | <b>JQ613252</b>                    |
| Viscaceae       | <i>Viscum articulatum</i>                                                                                                                            | <b>ViArPI-1 (JQ613255)</b>                                                    | <b>ViArTM6-1 (JQ613233)</b>                                                      |                                   |                      |          | <b>JQ613228</b>                    |                                    |
|                 |                                                                                                                                                      | <b>ViArPI-2 (JQ613254)</b>                                                    | <b>ViArTM6-2 (JQ613234)</b>                                                      |                                   |                      |          |                                    |                                    |
|                 | <i>Viscum aniliformosanae</i>                                                                                                                        | <b>ViAIPI (JQ613253)</b>                                                      | <b>ViAITM6 (JQ613236)</b>                                                        |                                   |                      |          | <b>JQ613227</b>                    | <b>JQ613265</b>                    |
| Solanales       |                                                                                                                                                      |                                                                               |                                                                                  |                                   |                      |          |                                    |                                    |
| Solanaceae      | <i>Petunia hybrida</i><br><i>Nicotiana sylvestris</i><br><i>Lycopersicon esculentum</i>                                                              | FBPI (m91190)<br>TPI (DQ674531)                                               | PhTM6 (AF230704)<br>TDR6 (X60759)                                                | PhGP (X69946)<br>LeAP3 (AF052868) | AF030171             |          | AY453113                           | DQ020641<br>U28403                 |
| Vitales         |                                                                                                                                                      |                                                                               |                                                                                  |                                   |                      |          |                                    |                                    |
| Vitaceae        | <i>Vitis vinifera</i><br><i>Vitis</i> sp.                                                                                                            | MADS9 (DQ988043)                                                              | VvTM6 (DQ979341)                                                                 | VvAP3 (EF418603)                  | AF450278             |          | NC_012119                          |                                    |
|                 |                                                                                                                                                      |                                                                               |                                                                                  |                                   |                      | AF207053 |                                    |                                    |

Note: sequences newly identified in this study are shown in bold.
